# Supplementary material for: Genome-Wide CRISPR Screen for Essential Cell Growth Mediators in Mutant KRAS Colorectal Cancers
Source: Oxford University Press journal article supplement (doi:10.1158/0008-5472.can-17-2043), 2017-09-27
Supplement: 00085472can172043-sup-186045_1_supp_4268017_bw8byv.xlsx [file 00085472can172043-sup-186045_1_supp_4268017_bw8byv.xlsx]

## Sheet: Sheet1
Table S2. Genes with > 1sgRNA more than 0.5 log2fold decreased in KRAS MUT xenografts compared to KRAS WT xenografts (ranked by second best sgRNA)
Gene Symbol	MUT-WT Fold change	FDR p-value
NTMT1	-2.00343	2.9717e-05
SLC41A2	-1.86392	0.00010239
C6orf163	-1.78799	0.00019408
hsa-mir-4506	-1.70582	0.00037752
ZDHHC2	-1.70324	0.00038529
MRVI1	-1.66772	0.0005091
hsa-mir-3939	-1.65694	0.00055345
ICAM5	-1.64622	0.00060114
hsa-mir-219a-1	-1.58748	0.00093733
TRNP1	-1.57547	0.00102467
SOS2	-1.5679	0.00108356
BCL7C	-1.56048	0.00114428
hsa-mir-4707	-1.53438	0.0013838
RRAGD	-1.53343	0.00139325
RPS16	-1.5197	0.00153796
OSBPL2	-1.48338	0.00198998
TP53I11	-1.47657	0.00208719
GLI4	-1.47334	0.00213485
CDH15	-1.47114	0.00216795
MTFR2	-1.46499	0.00226263
hsa-mir-4504	-1.45095	0.00249348
MSANTD3	-1.44307	0.00263231
hsa-mir-132	-1.43623	0.0027585
SOWAHB	-1.42412	0.00299546
PHLDA1	-1.41934	0.00309386
LTV1	-1.41047	0.00328468
hsa-mir-3656	-1.40571	0.00339134
TMEM245	-1.38502	0.00389279
DCAF13	-1.37157	0.00425412
TTI1	-1.36292	0.00450199
MSGN1	-1.35829	0.0046401
VMO1	-1.3537	0.0047808
ZBTB39	-1.3384	0.00527817
SWT1	-1.33475	0.00540339
GPATCH8	-1.31717	0.00604539
SLC17A8	-1.31116	0.00628048
EDN1	-1.30644	0.0064706
hsa-mir-5002	-1.30405	0.00656895
NMD3	-1.29818	0.0068155
GOT2	-1.2851	0.007396
GOLGA6L4	-1.27616	0.00781781
IRF8	-1.27515	0.00786704
RBM4B	-1.2748	0.00788442
AGPS	-1.26597	0.0083253
CENPC1	-1.26534	0.00835764
GINS4	-1.26303	0.0084767
ALK	-1.26242	0.00850867
PCGF6	-1.25219	0.00905741
TJAP1	-1.25015	0.00917087
C1orf64	-1.24728	0.00933214
NSUN6	-1.24126	0.00967909
CDYL	-1.23868	0.00983115
SLC25A27	-1.23856	0.0098384
RELN	-1.23571	0.0100087
CYP1B1	-1.23226	0.0102192
GSG1L	-1.22693	0.0105512
LDHA	-1.22688	0.0105548
hsa-mir-4638	-1.22566	0.0106317
IGF1	-1.22467	0.010695
GPRC6A	-1.22388	0.010746
LDHD	-1.22003	0.0109953
SRP14	-1.21944	0.0110342
KIAA1324	-1.21878	0.0110777
hsa-mir-3919	-1.21559	0.0112904
ZBTB3	-1.21448	0.0113652
hsa-mir-3152	-1.21018	0.0116586
XPO6	-1.20695	0.0118834
TMEM135	-1.20577	0.0119674
VSIG8	-1.19901	0.0124533
SNCA	-1.19797	0.0125298
hsa-mir-4453	-1.19662	0.0126294
CXCR6	-1.19566	0.0127007
SMC1A	-1.18785	0.0132951
hsa-mir-6768	-1.18732	0.0133365
PIP5KL1	-1.18658	0.0133939
STX5	-1.18371	0.0136199
TNFRSF1A	-1.18359	0.0136296
KLHDC7A	-1.18221	0.0137391
hsa-mir-4672	-1.17851	0.0140374
OR7A10	-1.1768	0.0141772
MED6	-1.17088	0.0146708
FRS2	-1.1701	0.014737
KLK2	-1.17003	0.0147435
MTRNR2L5	-1.16199	0.0154408
PAH	-1.1574	0.0158525
ELMO1	-1.15546	0.0160285
LHPP	-1.15415	0.0161485
GRIA1	-1.1494	0.0165915
KCTD13	-1.14928	0.0166029
AZI1	-1.14272	0.0172323
PLD6	-1.14038	0.0174618
HNF1B	-1.14025	0.0174752
FEV	-1.13848	0.0176508
KRT15	-1.13744	0.017754
RPL36A	-1.13656	0.0178433
hsa-mir-3621	-1.13293	0.0182107
XRCC4	-1.13266	0.0182385
PIGY	-1.13177	0.0183304
KAT2A	-1.12345	0.0192047
R3HDM4	-1.12317	0.0192338
SMKR1	-1.12313	0.0192384
PF4V1	-1.12299	0.0192536
KIRREL2	-1.1211	0.0194568
MTX3	-1.12025	0.0195505
RAB15	-1.11944	0.0196383
GABRR1	-1.11573	0.0200481
hsa-mir-1180	-1.11323	0.0203276
ANKRD33	-1.11243	0.0204178
IKBKAP	-1.10872	0.0208412
HOOK2	-1.10746	0.0209866
ACTR8	-1.1051	0.0212623
SLC25A3	-1.10459	0.0213221
STAU1	-1.10438	0.0213472
ABCD2	-1.10219	0.0216051
ZNF711	-1.09918	0.0219664
TMEM252	-1.09814	0.0220918
OR2H1	-1.09546	0.0224179
STX11	-1.09426	0.0225662
FCHO1	-1.09286	0.0227396
FN3KRP	-1.0912	0.0229466
ZCCHC13	-1.08625	0.0235731
MED20	-1.08549	0.0236705
NDUFAF1	-1.08261	0.0240436
PHOSPHO1	-1.07923	0.0244888
PPP2R5B	-1.07852	0.0245819
UBIAD1	-1.07839	0.0245993
PPP1R9A	-1.07709	0.0247734
hsa-mir-5090	-1.06994	0.0257459
OTX1	-1.06861	0.0259306
COMMD9	-1.06406	0.0265718
NUDCD2	-1.06405	0.0265729
ZNF212	-1.0627	0.0267648
NPIPA5	-1.05704	0.0275851
KRTAP10-11	-1.05523	0.0278523
RNF168	-1.05493	0.0278976
ZBTB7A	-1.05418	0.0280085
hsa-mir-4427	-1.05407	0.028025
ATXN7L3	-1.0533	0.02814
ZNF721	-1.04995	0.0286432
SKIDA1	-1.04953	0.028708
SMIM20	-1.04776	0.0289781
ABI3BP	-1.04743	0.0290284
USP12	-1.03784	0.0305323
LBP	-1.03163	0.0315422
ADCYAP1	-1.03109	0.0316309
KHK	-1.02977	0.03185
hsa-mir-4733	-1.0285	0.0320612
GPHA2	-1.02764	0.0322045
OR2AK2	-1.02741	0.0322447
hsa-mir-3132	-1.02686	0.032336
S100G	-1.02678	0.0323496
PARK7	-1.02238	0.0330977
ASNA1	-1.01693	0.0340453
MAGEB6	-1.0157	0.0342631
TMEM108	-1.01442	0.0344895
WRAP53	-1.01428	0.0345145
VIT	-1.01415	0.0345367
ZNF774	-1.01296	0.0347514
CDC20	-1.01252	0.0348294
PTRH1	-1.01194	0.0349333
PSG9	-1.01091	0.0351183
NR4A2	-1.00658	0.0359095
PJA2	-1.00543	0.0361212
SFTPC	-1.00436	0.0363195
RPL29	-1.00411	0.0363658
HS3ST3A1	-1.00333	0.0365119
MEP1A	-0.999778	0.0371799
CERS1	-0.998782	0.0373694
hsa-mir-3167	-0.997254	0.0376611
CCL5	-0.996571	0.0377925
RAB3GAP2	-0.994107	0.0382691
hsa-mir-6877	-0.992902	0.0385039
C17orf82	-0.992821	0.0385195
PROB1	-0.990254	0.0390241
C7orf43	-0.989158	0.039241
NET1	-0.988915	0.0392897
HAX1	-0.988502	0.0393718
hsa-mir-3927	-0.985292	0.0400156
SEC61G	-0.981368	0.040814
RBCK1	-0.981034	0.0408831
HPX	-0.980119	0.0410715
PTRH2	-0.978679	0.0413697
TOPORS	-0.975417	0.0420522
UCN3	-0.97502	0.0421354
MCCC1	-0.974601	0.0422235
PSMB1	-0.972893	0.0425863
GPBP1L1	-0.967406	0.0437676
NGFR	-0.967265	0.043798
RPL9	-0.960985	0.0451848
MMP23B	-0.960356	0.0453262
SUPT3H	-0.960014	0.0454027
NAA15	-0.959798	0.0454515
KRTAP12-4	-0.95925	0.0455746
BEST3	-0.955905	0.0463329
KCNK5	-0.955518	0.0464219
TGDS	-0.954456	0.0466662
COG5	-0.94827	0.0481068
TRABD2B	-0.947692	0.0482433
FOXL2	-0.947116	0.0483789
C7orf63	-0.945127	0.0488527
SH2D4B	-0.941577	0.0497064
BAG5	-0.940519	0.0499636
GIMAP7	-0.940354	0.0500044
CDH23	-0.939605	0.0501866
OR2AG2	-0.93797	0.0505877
ADSS	-0.937575	0.0506854
SULT6B1	-0.936972	0.050834
ZNF765	-0.935604	0.0511732
NEFM	-0.932955	0.0518341
MSH4	-0.932674	0.0519049
PSMA5	-0.932612	0.0519213
GLUL	-0.931734	0.0521424
AURKAIP1	-0.931603	0.0521752
TNFAIP8L2	-0.931354	0.0522372
CCDC38	-0.931018	0.0523226
hsa-mir-6511a-3	-0.930519	0.0524488
hsa-mir-6862-1	-0.929387	0.0527367
hsa-mir-548k	-0.928003	0.0530904
ILF2	-0.926233	0.0535454
NREP	-0.925664	0.0536921
NPY1R	-0.925558	0.0537195
LPAR2	-0.925529	0.0537274
hsa-mir-4785	-0.92323	0.0543248
TAS2R39	-0.92189	0.0546752
ZNF879	-0.920391	0.0550706
EYS	-0.920354	0.0550796
TNFRSF10B	-0.91936	0.0553433
FBXO28	-0.919088	0.0554147
UBE2S	-0.917692	0.0557877
MASP1	-0.914288	0.0567022
C14orf180	-0.912974	0.0570591
TLE1	-0.911886	0.0573549
SMC6	-0.911598	0.0574338
hsa-mir-4750	-0.910795	0.0576541
SLC37A3	-0.910286	0.0577943
CLEC11A	-0.90653	0.0588347
TSPAN11	-0.904828	0.059311
CCDC37	-0.903984	0.0595484
PSMC2	-0.901045	0.0603809
HIST2H2AC	-0.899063	0.0609491
CXCR4	-0.897137	0.0615041
hsa-mir-3126	-0.897026	0.0615357
hsa-mir-4493	-0.896001	0.0618338
UTP15	-0.895284	0.0620426
TICRR	-0.894243	0.0623466
POP7	-0.894012	0.0624135
TMA16	-0.89337	0.0626033
GPR115	-0.892599	0.0628304
KRT82	-0.889066	0.0638783
hsa-mir-1301	-0.888388	0.0640807
SLC35A1	-0.888329	0.0640981
QTRTD1	-0.887361	0.064389
FGF1	-0.88715	0.0644525
PDAP1	-0.885789	0.0648624
CYB561A3	-0.884902	0.0651316
hsa-mir-30c-2	-0.883538	0.0655471
MICA	-0.882695	0.0658039
HFM1	-0.88252	0.0658577
SIGLEC6	-0.881398	0.0662032
LRP2	-0.881386	0.0662061
hsa-mir-7107	-0.881122	0.0662869
NR2F1	-0.879884	0.0666706
HMX3	-0.879056	0.0669261
PPIL3	-0.877765	0.0673282
RNF223	-0.875284	0.0681055
hsa-mir-3142	-0.874658	0.0683037
hsa-mir-607	-0.873445	0.0686867
hsa-mir-6504	-0.872901	0.0688592
AMD1	-0.871767	0.069221
SACS	-0.870203	0.0697205
NCOA5	-0.869713	0.0698782
PCDHGB4	-0.868756	0.0701878
ZNF461	-0.868618	0.0702321
TACR2	-0.867665	0.0705404
TAS2R38	-0.865781	0.0711526
SLC25A10	-0.865065	0.0713868
LRRC32	-0.863826	0.0717935
hsa-mir-4449	-0.861214	0.0726567
JMJD6	-0.860782	0.0728
hsa-mir-6511a-4	-0.858804	0.0734606
CRTAC1	-0.85842	0.0735892
hsa-mir-1183	-0.857926	0.0737547
GAL3ST4	-0.853488	0.0752605
PACSIN3	-0.853192	0.0753612
MTO1	-0.851906	0.0758017
ARMCX3	-0.85153	0.0759315
ZXDB	-0.85153	0.0759313
FAM24B	-0.849237	0.0767243
CERCAM	-0.847254	0.0774149
ZNF324	-0.846392	0.0777158
KRT80	-0.846325	0.0777411
FITM1	-0.845885	0.0778947
HHIPL1	-0.845127	0.0781612
hsa-mir-4726	-0.843622	0.0786937
MEOX1	-0.843464	0.0787494
SLC29A1	-0.843253	0.0788246
THBD	-0.842852	0.0789671
BOLA1	-0.841623	0.0794046
PNMAL2	-0.840544	0.0797911
SLC39A9	-0.837338	0.0809472
FBXO4	-0.836634	0.081202
FAM179B	-0.835739	0.081528
LOC100129216	-0.83515	0.0817431
IRF9	-0.83448	0.0819882
KCNK12	-0.833947	0.0821844
CENPL	-0.833539	0.0823343
HTT	-0.833085	0.0825012
NFYA	-0.831902	0.0829372
CDC25A	-0.831259	0.0831762
UBL5	-0.830509	0.0834539
hsa-mir-6788	-0.82968	0.0837621
RTEL1	-0.829388	0.0838716
hsa-mir-6883	-0.829238	0.0839282
hsa-mir-29a	-0.826003	0.0851426
KRTAP4-7	-0.823611	0.0860513
MTMR4	-0.823562	0.08607
COX7A1	-0.822087	0.086633
MRPS11	-0.821186	0.0869793
EXOC1	-0.820244	0.087343
EME1	-0.817999	0.0882107
hsa-mir-6745	-0.817034	0.0885865
hsa-mir-6799	-0.816662	0.0887319
RPL39L	-0.81583	0.0890579
SLC27A3	-0.815549	0.0891678
ANAPC16	-0.815455	0.0892049
GPR68	-0.815374	0.0892367
hsa-mir-6895	-0.814878	0.0894314
ICAM1	-0.814448	0.0895999
BCL9	-0.813912	0.0898106
TTC38	-0.813902	0.0898156
GSDMA	-0.813447	0.0899939
GNPNAT1	-0.81337	0.0900254
MPPED2	-0.81157	0.0907388
TDRD5	-0.811429	0.0907945
LYPLAL1	-0.811367	0.0908204
PSG2	-0.811039	0.0909503
IFI30	-0.810339	0.0912299
FABP1	-0.809508	0.0915619
MATN2	-0.808345	0.092029
TEAD1	-0.808308	0.0920442
ISYNA1	-0.805736	0.0930825
NANS	-0.804536	0.0935717
SUFU	-0.804009	0.0937872
TAGLN3	-0.803486	0.0940013
PAX2	-0.801547	0.0947962
MKL2	-0.80113	0.0949693
PLCB4	-0.800601	0.0951866
KLK7	-0.799641	0.0955844
AQP8	-0.799246	0.0957487
THOC6	-0.798444	0.096082
ZNF180	-0.797881	0.0963167
C15orf62	-0.796616	0.096846
hsa-mir-342	-0.794374	0.0977882
SLC25A11	-0.791875	0.0988473
hsa-mir-8053	-0.791596	0.0989669
NUDT8	-0.790457	0.0994542
hsa-mir-3907	-0.790194	0.0995671
ZKSCAN5	-0.78953	0.0998505
COL6A1	-0.789355	0.0999265
SEC16A	-0.789154	0.100013
GNL2	-0.789141	0.100018
RAB43	-0.78887	0.100134
hsa-mir-708	-0.788765	0.10018
HINT1	-0.788513	0.100289
CHST14	-0.788188	0.100428
PYURF	-0.78796	0.100527
CLCNKA	-0.786887	0.100991
ATG4C	-0.785143	0.101749
OR2L13	-0.781916	0.103164
NPEPL1	-0.780831	0.103643
SLC5A12	-0.780677	0.103712
C9orf163	-0.780326	0.103867
PLXNB2	-0.780151	0.103944
ACSF3	-0.779822	0.10409
DRGX	-0.779772	0.104113
EMC4	-0.77968	0.104153
B4GALT6	-0.779492	0.104236
C5orf51	-0.779425	0.104266
STAT3	-0.779139	0.104394
TIPIN	-0.77813	0.104843
ZC4H2	-0.773734	0.106819
hsa-mir-3663	-0.773682	0.106843
NICN1	-0.773382	0.10698
BRINP2	-0.772895	0.107201
RPL22L1	-0.769258	0.108865
WFDC2	-0.769153	0.108911
LENG9	-0.768617	0.109158
MPEG1	-0.76828	0.109314
ZNF764	-0.766234	0.110261
UTP3	-0.765757	0.110483
hsa-mir-378g	-0.762995	0.111773
FAM98C	-0.762691	0.111918
CYB5R3	-0.761713	0.112378
hsa-mir-653	-0.760966	0.11273
WAPAL	-0.760965	0.11273
KCNC2	-0.759683	0.113338
ZFP36L1	-0.7593	0.11352
LGALS16	-0.756837	0.114695
hsa-mir-3147	-0.756408	0.114901
FAM107A	-0.75636	0.114923
CLDN22	-0.755046	0.115556
ATP5G3	-0.754599	0.115771
SUCLA2	-0.754288	0.115923
HBEGF	-0.753376	0.116363
RD3	-0.753329	0.116385
ATP6V1G3	-0.753013	0.116539
PDZD8	-0.751537	0.117258
THSD7B	-0.751413	0.117318
CD2	-0.751185	0.117429
hsa-mir-6511a-2	-0.751185	0.11743
OR10H2	-0.751097	0.117472
PICK1	-0.750694	0.117669
EIF4ENIF1	-0.750227	0.117897
DDIT4	-0.749555	0.118226
LOC100288524	-0.749188	0.118408
TRIM64B	-0.748891	0.118553
NCOR1	-0.748377	0.118806
FDX1L	-0.746726	0.119622
MAPK1	-0.746431	0.119767
ECSCR	-0.74627	0.119849
GALK1	-0.743152	0.121403
PHLPP1	-0.742348	0.121807
SDCCAG8	-0.742207	0.121878
PANK2	-0.741036	0.122466
SRF	-0.740934	0.122519
PCYOX1L	-0.740094	0.122942
PHRF1	-0.739329	0.123331
PAM16	-0.738391	0.123807
hsa-mir-4663	-0.738359	0.123824
NWD1	-0.738213	0.123896
ARCN1	-0.738126	0.123942
PTCH1	-0.738086	0.123963
PDIA4	-0.737905	0.124055
SDE2	-0.737467	0.124278
NIPA2	-0.737434	0.124295
TSEN2	-0.736709	0.124667
CPD	-0.735446	0.125312
NXPE3	-0.735429	0.125322
BAALC	-0.734136	0.125985
ZNF783	-0.733917	0.1261
ADAM11	-0.733019	0.126564
MSMO1	-0.732707	0.126727
CENPQ	-0.731674	0.127262
HIST1H2BB	-0.730619	0.127813
GREB1	-0.729977	0.128147
hsa-mir-650	-0.729749	0.128265
hsa-mir-6511a-1	-0.729431	0.128433
FAM203A	-0.728968	0.128675
ACR	-0.728237	0.129059
TEAD3	-0.728016	0.129174
RGL2	-0.727709	0.129336
EFCAB4B	-0.727577	0.129405
MIOS	-0.727038	0.12969
CNTRL	-0.727036	0.12969
UGT3A2	-0.725992	0.130244
OR4F15	-0.724623	0.130968
TUBA3D	-0.723951	0.131327
L3HYPDH	-0.7217	0.13253
PPP4C	-0.721638	0.132564
GFPT1	-0.718919	0.134029
CPZ	-0.71755	0.13477
EGLN2	-0.716695	0.135234
hsa-mir-548f-5	-0.716395	0.1354
RSL1D1	-0.715753	0.13575
FAM174B	-0.715422	0.135932
TIGD3	-0.715215	0.136045
TIA1	-0.715008	0.136158
FGF21	-0.713478	0.136998
TULP2	-0.713239	0.137129
DCHS2	-0.713046	0.137236
RNF214	-0.711818	0.137914
NPR3	-0.710836	0.138457
RAB17	-0.710521	0.138633
SULT1C3	-0.709572	0.139159
CPXM1	-0.709158	0.139392
SCAMP1	-0.70849	0.139766
OR52L1	-0.707966	0.140057
CSF2RB	-0.707111	0.140538
TIMM9	-0.706295	0.140996
POLD2	-0.705773	0.141289
GRIK2	-0.705311	0.141551
DAPL1	-0.705036	0.141706
ACO2	-0.704653	0.141922
ERMN	-0.702343	0.143232
BCDIN3D	-0.701779	0.143553
WNT2	-0.701625	0.143642
hsa-mir-425	-0.701363	0.143792
LOC100144595	-0.701227	0.143872
DMGDH	-0.700217	0.144447
ZNF229	-0.699989	0.144579
ARHGEF11	-0.699217	0.145023
hsa-mir-495	-0.699154	0.145059
JAKMIP1	-0.698637	0.145355
GEMIN2	-0.698521	0.145423
CACNB1	-0.698483	0.145445
hsa-mir-6879	-0.698154	0.145635
KCNA7	-0.697374	0.146084
HBE1	-0.69698	0.146314
FOXF1	-0.69361	0.148274
CD207	-0.693425	0.148382
FKBP2	-0.693296	0.148458
OR8G2	-0.692015	0.149211
RNF44	-0.691763	0.149357
LPCAT1	-0.691713	0.149386
CCRL2	-0.691014	0.149798
RNF208	-0.690692	0.149988
FBXW7	-0.690198	0.150282
PEAK1	-0.68998	0.150409
NKD2	-0.689945	0.150429
HCFC1	-0.689308	0.150807
EIF4G1	-0.689216	0.150861
TBC1D25	-0.688725	0.151152
hsa-mir-192	-0.688448	0.151318
LAIR1	-0.688396	0.151349
hsa-mir-8064	-0.687297	0.152003
hsa-mir-151b	-0.687271	0.152016
hsa-mir-601	-0.686921	0.152223
PYROXD2	-0.686363	0.152559
CKLF-CMTM1	-0.686243	0.152631
SHOX2	-0.685633	0.152996
CCT7	-0.685159	0.15328
TMEM41B	-0.684968	0.153394
PVRIG	-0.683994	0.153979
hsa-mir-548ac	-0.682768	0.15472
MED12	-0.682217	0.155054
CCDC108	-0.681519	0.155475
SHC4	-0.680697	0.155975
hsa-mir-548f-2	-0.680634	0.156014
ILDR2	-0.680438	0.156132
IDH1	-0.679879	0.156472
MAP3K13	-0.679764	0.156542
DES	-0.678788	0.157137
FCGR1A	-0.678344	0.157409
PDE4DIP	-0.677936	0.157662
IGSF11	-0.676705	0.158416
UBE2I	-0.676243	0.158702
hsa-mir-1266	-0.676143	0.158761
ISLR2	-0.675918	0.1589
CDX1	-0.675162	0.159368
EPB49	-0.672384	0.161089
PPM1N	-0.672202	0.161201
hsa-mir-4802	-0.672192	0.161211
PSMC5	-0.67199	0.161336
NLRP9	-0.671855	0.16142
DEXI	-0.671659	0.161542
hsa-mir-6747	-0.671631	0.16156
SRFBP1	-0.670466	0.162288
RPL10A	-0.67038	0.162341
GRIPAP1	-0.669327	0.163001
NR2C2AP	-0.667997	0.16384
CDH17	-0.667323	0.164266
DEPTOR	-0.666945	0.164506
hsa-mir-6751	-0.665192	0.165617
TRIM45	-0.665159	0.165638
USH1C	-0.664112	0.166306
DHDDS	-0.663858	0.166467
EIF2AK2	-0.662602	0.167271
ZNF799	-0.662127	0.167576
INF2	-0.661823	0.167769
C20orf96	-0.661788	0.167792
TBC1D2B	-0.660164	0.16884
ZNHIT6	-0.660086	0.168889
SEC14L1	-0.65981	0.169067
GP1BA	-0.659761	0.169098
TINF2	-0.657409	0.170624
CHAF1A	-0.655777	0.171687
SOX10	-0.654637	0.172434
NR2C2	-0.654016	0.172842
TYW1	-0.654016	0.172841
CDK6	-0.652761	0.173667
hsa-mir-23b	-0.65226	0.173997
SEMA4A	-0.652217	0.174025
TBC1D14	-0.652102	0.174102
SUSD5	-0.652036	0.174145
GNG3	-0.65177	0.174321
IL6R	-0.650494	0.175166
hsa-mir-152	-0.650415	0.175218
GPR18	-0.650048	0.175462
HMX2	-0.649188	0.176034
C16orf89	-0.64904	0.176133
HMGN2	-0.648985	0.176169
hsa-mir-26a-2	-0.648169	0.176714
hsa-mir-302c	-0.647928	0.176875
KCTD17	-0.647928	0.176875
FRRS1	-0.647828	0.176942
RIC8A	-0.646898	0.177563
USP34	-0.646236	0.178006
ZSCAN9	-0.645455	0.178534
SDAD1	-0.64422	0.179364
C19orf26	-0.64407	0.179464
hsa-mir-5692c-2	-0.643187	0.180061
PTPN6	-0.641952	0.180901
FAM153B	-0.641685	0.181084
KLK8	-0.641378	0.181291
HDAC11	-0.641178	0.181426
CYP2U1	-0.641167	0.181436
hsa-mir-6500	-0.641146	0.18145
RRBP1	-0.640021	0.182216
GLRA4	-0.639973	0.182251
PTMA	-0.639892	0.182305
CARNS1	-0.639367	0.182663
KCNB1	-0.638469	0.183279
hsa-mir-6805	-0.638019	0.183587
HTR5A	-0.637424	0.183997
hsa-mir-6841	-0.637176	0.184169
hsa-mir-330	-0.636833	0.184404
GABRR2	-0.636417	0.18469
SQLE	-0.63624	0.184813
KCTD21	-0.635821	0.185101
GCNT7	-0.634012	0.186356
FAM25G	-0.632679	0.187283
ZNF354B	-0.632539	0.18738
hsa-mir-6806	-0.632431	0.187457
hsa-mir-4473	-0.632107	0.187681
SLC7A2	-0.631756	0.187928
GSTT2B	-0.63081	0.188589
MOG	-0.630725	0.18865
hsa-mir-154	-0.63053	0.188786
hsa-mir-3166	-0.629295	0.189654
OCLM	-0.629072	0.189809
LOC646862	-0.629067	0.189813
HIATL1	-0.625081	0.192635
ZNF572	-0.624155	0.193294
hsa-mir-4540	-0.623552	0.193725
SLC37A1	-0.623118	0.194037
RB1CC1	-0.622768	0.194288
hsa-mir-4647	-0.622151	0.194727
RPS23	-0.621083	0.195494
hsa-mir-4765	-0.620868	0.195649
hsa-mir-92b	-0.620633	0.19582
PTAFR	-0.620441	0.195958
BIRC7	-0.620301	0.196059
APCDD1L	-0.619191	0.196862
ERI2	-0.61906	0.196955
MTPAP	-0.619011	0.196992
SPRY1	-0.618382	0.197448
FOXD1	-0.617724	0.197923
GCH1	-0.61764	0.197985
LRG1	-0.617539	0.198057
OTUD6B	-0.617365	0.198184
TEX2	-0.617257	0.198261
hsa-mir-4297	-0.616647	0.198708
hsa-mir-1257	-0.61661	0.198732
LCN9	-0.61606	0.199133
hsa-mir-200c	-0.615887	0.199259
ZAP70	-0.615773	0.199343
MYL4	-0.615016	0.199897
NPR1	-0.614793	0.20006
TIMM21	-0.614672	0.200147
hsa-mir-6794	-0.6144	0.200347
LIN28A	-0.61429	0.200429
SNRPC	-0.613616	0.200922
LYNX1	-0.612646	0.201635
hsa-mir-4800	-0.612556	0.201702
ATP5F1	-0.612485	0.201754
hsa-mir-31	-0.612028	0.202092
MRGPRD	-0.611353	0.202589
CCDC3	-0.611237	0.202674
MAP3K19	-0.611177	0.202721
ZSWIM8	-0.611058	0.202807
hsa-mir-1289-2	-0.609873	0.203685
GAGE2A	-0.609786	0.203747
HECTD3	-0.608902	0.204405
FKBP5	-0.608817	0.204467
BTBD18	-0.608775	0.2045
USP2	-0.6083	0.204852
hsa-mir-6779	-0.607318	0.205587
RRP9	-0.606043	0.206539
NADK2	-0.605599	0.206869
hsa-mir-3165	-0.604593	0.207626
hsa-mir-548i-2	-0.603534	0.208424
GSC	-0.603322	0.208583
CISD3	-0.601479	0.209976
TSPO	-0.601387	0.210047
RPS17	-0.601196	0.21019
MYCBPAP	-0.60091	0.210406
IFNE	-0.600785	0.210504
KLB	-0.599336	0.211602
RNF103-CHMP3	-0.598738	0.212061
CCNC	-0.598467	0.212268
hsa-mir-378b	-0.59844	0.212289
hsa-mir-4262	-0.597798	0.212779
CPNE4	-0.597266	0.213189
PNPO	-0.596763	0.213574
TRIM5	-0.595828	0.21429
FEZF2	-0.59552	0.214529
G6PC	-0.594538	0.215283
DHPS	-0.594072	0.215645
hsa-mir-3188	-0.593004	0.216472
ZNF23	-0.592677	0.216726
COG2	-0.591961	0.217281
NTS	-0.591704	0.217479
DSN1	-0.591522	0.217621
OR2A2	-0.591324	0.217776
AQPEP	-0.59096	0.218058
C1orf131	-0.590873	0.218127
RGMB	-0.590777	0.218201
KIF2C	-0.589562	0.219152
RPS17L	-0.589195	0.219439
BRIX1	-0.588927	0.219645
FAM19A2	-0.588786	0.219757
PMPCB	-0.588607	0.2199
VPS29	-0.587744	0.220575
CP	-0.587282	0.220937
AATF	-0.586024	0.221926
CXCL14	-0.585351	0.22246
ASIP	-0.584692	0.222981
ZNF326	-0.584188	0.223378
HOXD9	-0.583627	0.223825
CSNK1E	-0.583252	0.224122
GSPT1	-0.582451	0.224757
ZNF410	-0.582367	0.224825
PIGH	-0.582047	0.22508
FGFR3	-0.581417	0.225581
ISLR	-0.581337	0.225646
hsa-mir-8071-2	-0.581246	0.22572
FTH1P18	-0.580714	0.226143
C7orf50	-0.580114	0.226624
DDHD2	-0.579876	0.226814
SNAPC1	-0.579497	0.227119
E2F5	-0.579135	0.227408
TTC12	-0.578517	0.227906
VSIG10	-0.578367	0.228024
LMBRD1	-0.578198	0.228164
EDN3	-0.577917	0.228388
hsa-mir-4435-1	-0.577228	0.228946
KIFC2	-0.577089	0.229057
CBX6	-0.576797	0.22929
FAM166A	-0.576763	0.229319
NRAS	-0.575537	0.230309
DDX49	-0.574346	0.231275
MUC16	-0.574075	0.231496
NPHP3	-0.57378	0.231738
SAA2	-0.573445	0.23201
ARID4A	-0.57261	0.232689
ZC3H18	-0.572414	0.232849
hsa-mir-6847	-0.572312	0.23293
ACTR10	-0.571797	0.233352
CASK	-0.571361	0.23371
SLC5A5	-0.571175	0.233861
hsa-mir-4440	-0.570851	0.234126
IFNA21	-0.570651	0.234291
VEZF1	-0.570649	0.234293
hsa-mir-548l	-0.570363	0.234526
FAM126B	-0.570347	0.23454
RNF43	-0.569698	0.235073
KRTAP13-4	-0.569278	0.235417
C2CD4D	-0.568717	0.235881
NAB1	-0.568342	0.236189
CRABP2	-0.568233	0.236281
hsa-mir-8058	-0.567332	0.237025
APOBR	-0.56684	0.237431
NBEAL2	-0.565395	0.238629
GATA5	-0.564714	0.239195
CACNG3	-0.564614	0.239279
RBP5	-0.564574	0.239309
LAMB1	-0.564346	0.239502
RIOK1	-0.561983	0.241474
STAB2	-0.561914	0.241532
hsa-mir-363	-0.561352	0.242004
CORO7	-0.560946	0.242343
IMPG1	-0.560205	0.242965
THAP2	-0.559603	0.243473
SPDYE2L	-0.558161	0.24469
TTF2	-0.556552	0.246051
BET1L	-0.556302	0.246262
hsa-mir-3665	-0.555092	0.247294
ARL14EP	-0.555055	0.247326
BMP3	-0.554004	0.24822
ESRP1	-0.553021	0.249063
EBI3	-0.552534	0.249479
NADK	-0.552316	0.249665
TCHH	-0.551821	0.250091
ZNF274	-0.551524	0.250344
CMTR2	-0.55148	0.250383
CXCR5	-0.551277	0.250557
LAMP1	-0.550837	0.250934
VAMP2	-0.550656	0.251091
TRAIP	-0.550377	0.251333
